# Supplementary material for: Impacts of fertilization on grassland productivity and water quality across the European Alps under current and warming climate: insights from a mechanistic model
Source: Copernicus journal article supplement (doi:10.5194/bg-18-1917-2021), 2021-03-19
Supplement: Supplementary file 1 [file bg-18-1917-2021-supplement.zip]

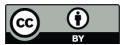

*Supplement of*

**Impacts of fertilization on grassland productivity and water quality across the European Alps under current and warming climate: insights from a mechanistic model**

**Martina Botter et al.**

*Correspondence to:* Martina Botter (botter@ifu.baug.ethz.ch)

- bg-18-1917-2021-supplement-title-page.pdf
- Supplementary
  - Botter\_et\_al\_SI.pdf
  - Table S1.xlsx

The copyright of individual parts of the supplement might differ from the article licence.
