# Supplementary material for: Impacts of fertilization on grassland productivity and water quality across the European Alps under current and warming climate: insights from a mechanistic model
Source: Copernicus journal article supplement (doi:10.5194/bg-18-1917-2021), 2021-03-19
Supplement: Supplementary file 1 [file Table S1.xlsx]

## Sheet: All_stations_FinalParametriz
			CHA	OEN	FEN	ROT	GRA	STU	FRU	MB	TOR
Soil clay content	[0-1]	Pcla	0.244	0.2	0.3	0.29	0.52	0.11	0.22	0.22	0.1
Soil sand content	[0-1]	Psan	0.254	0.6	0.27	0.26	0.09	0.42	0.29	0.29	0.45
Soil organic matter content	[0-1]	Porg	0.085	0.11	0.04	0.04	0.06	0.1	0.12	0.1	0.1
Plant type (2= Grass species)	-	aSE_L	2	2	2	2	2	2	2	2	2
Root depth 95 percentile	mm	ZR95_L	250	250	250	250	250	250	250	250	250
Specific interception of rainfall for unit leaf area	mm LAI-1	Sp_LAI_L_In	0.2	0.2	0.2	0.2	0.2	0.2	0.2	0.2	0.2
Leaf characteristc dimension	cm	d_leaf_L	0.8	0.8	0.8	0.8	0.8	0.8	0.8	0.8	0.8
Canopy nitrogen decay coefficient	-	KnitL	0.15	0.15	0.15	0.15	0.15	0.15	0.15	0.15	0.15
Linear coefficient of increasing specific leaf area with LAI	m2 LAI gC-1 m2 PFT m-2 LAI-1	mSl_L	0	0	0	0	0	0	0	0	0
Intrinsec quantum efficiency	umolCO2. umolPhotons-1	FI_L	0.081	0.081	0.081	0.081	0.081	0.081	0.081	0.081	0.081
Empirical coefficient for the role of vapor pressure in the biochemical model of photosyntesis	Pa	Do_L	1000	1000	1000	1000	1000	1000	1000	1000	1000
Empirical parametr connecting stomatal aperture and net assimilation	-	a1_L	6	6	6	6	6	6	6	6	6
Minimum stomatal conductance	molCO2 s-1 m2	go_L	0.01	0.01	0.01	0.01	0.01	0.01	0.01	0.01	0.01
Photosynthesis pathway C3 or C4	[3-4]	CT_L	3	3	3	3	3	3	3	3	3
Activation energy in photosynthesis for Rubisco capacity	kJ mol-1	DSE_L	0.65	0.65	0.65	0.65	0.65	0.65	0.65	0.65	0.65
Activation energy	kJ mol-1 K-1	Ha_L	55	55	55	55	55	55	55	55	55
Mesphyll conductance	ml CO2 s-1 m-2	gmes_L	Inf	Inf	Inf	Inf	Inf	Inf	Inf	Inf	Inf
Scaling factor between Jmax and Vmax	umolEq umolCO2-1	rjv_L	2.2	2.2	2.2	2.2	2.2	2.2	2.2	2.2	2.2
Maximum Rubisco capacity at 25°C leaf level	umol CO2 m2 s-1	Vmax_L	70	65	57	50	47	50	68	75	60
Water potential at the beginning of stomatal closure	MPa	Psi_sto_00_L	-0.5	-0.5	-0.5	-0.5	-0.5	-0.5	-0.5	-0.5	-0.5
Water potential at 50% of stomatal closure	MPa	Psi_sto_50_L	-3	-3	-3	-3	-3	-3	-3	-3	-3
Water potential at the beginning of leaf hydraulic conductivity decrease	MPa	PsiL00_L	-0.9	-0.9	-0.9	-0.9	-0.9	-0.9	-0.9	-0.9	-0.9
Water potential at 50% of leaf hydraulic conductivity	MPa	PsiL50_L	-4	-4	-4	-4	-4	-4	-4	-4	-4
Water potential at 50% of xylem hydraulic conductivity nd limit for water extraction from soil	MPa	PsiX50_L	-4.5	-4.5	-4.5	-4.5	-4.5	-4.5	-4.5	-4.5	-4.5
Waer potentia at 50% impairment of growth and allocation control	Mpa	PsiG50_L	-3	-3	-3	-3	-3	-3	-3	-3	-3
Waer potentia at 99% impairment of growth and allocation control	Mpa	PsiG99_L	-4	-4	-4	-4	-4	-4	-4	-4	-4
Parameter of maximum growth in perfect conditions	gC m-2 day-1	gcoef_L	3.5	3.5	3.5	3.5	3.5	3.5	3.5	3.5	3.5
Within canopy clumping factor	-	OM_L	1	1	1	1	1	1	1	1	1
specific leaf area	m2 gC-1	Sl_L	0.035	0.035	0.03	0.03	0.03	0.04	0.035	0.023	0.021
Leaf carbon nitrogen ratio	gC gN-1	Nl_L	19	19	19	19	19	19	19	19	19
Maintenance respiration rate at 10°	gC gN-1 d-1	r_L	0.06	0.06	0.06	0.06	0.06	0.06	0.06	0.06	0.06
Growth respiration coefficient	-	gR_L	0.25	0.25	0.25	0.25	0.25	0.25	0.25	0.25	0.25
Maximum leaf mortality factor for drougth	d	dd_max_L(i)^(-1)	45	45	45	45	45	45	45	45	45
Factor of increasing mortality with cold	d°C	dc_C_L(i)^(-1)	52.1429	52.1429	52.1429	52.1429	52.1429	52.1429	52.1429	52.1429	52.1429
Cold leaf sled	°C	Tcold_L	-3	-2	-3	-3	-3	-2	-2	0	3
Fine root turnover rate	d	drn_L(i)^(-1)	450	450	450	450	450	450	450	450	450
Critical leaf age	d	age_cr_L	180	180	180	180	180	180	180	180	120
Mean temperature for leaf onset	-	Bfac_lo_L	0.99	0.99	0.99	0.99	0.99	0.99	0.99	0.99	0.99
Threshold temperature for leaf onset	°C	Tlo_L	0	0	1.5	1.5	0.5	-1.5	0	-3	0
Days of maximum growth	d	dmg_L	20	20	20	20	20	20	20	20	20
Minimum leaf area index for complete defoliation	m2 LAI m-2 PFT-1	LAI_min_L	0.1	0.1	0.1	0.1	0.1	0.1	0.1	0.1	0.1
Translocation rate from carbohydrate reserve	gC m-2 d-1	Trr_L	1.8	1.8	1.8	2.5	1.8	1.8	1.8	1.8	3
Maximum day of the year for leaf onset	[1-365]	mjDay_L	250	250	250	250	250	250	250	250	200
Threshold for leaf onset: hours of light	h	LDay_min_L	10.7	10.7	10.7	10.7	10.7	11.1	10.7	11.2	12.2
Leaf to root biomass maximum ratio	-	LtR_L	0.35	0.35	0.6	0.6	0.6	0.5	0.35	0.35	0.5
Parameter for allocation to carbon reserves	[0-1]	eps_ac_L	0.2	0.2	0.2	0.2	0.2	0.2	0.2	0.2	0.2
Threshold for senescence: hours of light	h	LDay_cr_L	10.7	10.7	10.7	10.7	10.7	10.7	10.7	11.2	14.2
Dead leaf fall turnover	d	Klf_L(i)^(-1)	50	50	30	30	30	50	50	50	30
Foliage cover decay factor for throughfall	-	Kct	0.75	0.75	0.75	0.75	0.75	0.75	0.75	0.75	0.75
nterception parameter	mm-1	gcI	3.7	3.7	3.7	3.7	3.7	3.7	3.7	3.7	3.7
Iterception drainage rate coefficient	mm	KcI	0.06	0.06	0.06	0.06	0.06	0.06	0.06	0.06	0.06
Specific interception snow for unit leaf area	mm LAI-1	Sp_SN_In	5.9	5.9	5.9	5.9	5.9	5.9	5.9	5.9	5.9
Specific leaf area of litter	m2 litter kg-1 DM-1	Sllit	2	2	2	2	2	2	2	2	2
Fraction of the EM mycorrhizal on the mycohrrizal		ExEM	0	0	0	0	0	0	0	0	0
Type of root profile		CASE_ROOT	1	1	1	1	1	1	1	1	1
Threshold temperature snow	°C	TminS	-0.8	-0.8	-0.8	-0.8	-0.8	-0.8	-0.8	-0.8	-0.8
Threshold temperature snow	°C	TmaxS	2.8	2.8	2.8	2.8	2.8	2.8	2.8	2.8	2.8
	kg m-3	ros_max1	580	580	580	580	580	580	580	580	580
	kg m-3	ros_max2	300	300	300	300	300	300	300	300	300
Threshold intensity of snow to consider a new snowfall	mm day-1	Th_Pr_sno	8	8	8	8	8	8	8	8	8
Specific maximum watercontent ice	-	Ice_wc_sp	0.01	0.01	0.01	0.01	0.01	0.01	0.01	0.01	0.01
Density threshold to transform snow into ice	kg m-3	ros_Ice_thr	500	500	500	500	500	500	500	500	500
Ice albedo	-	Aice	0.28	0.28	0.28	0.28	0.28	0.28	0.28	0.28	0.28
Water freezing layer progression without snow-layer	mm h-1	dz_ice	0.45	0.45	0.45	0.45	0.45	0.45	0.45	0.45	0.45
LAI of grass after cut	LAI	LAI_cut	1.68	1.68	1.68	1.68	1.68	1.68	1.68	1.68	1.68
Number of cuts	-	Number of cuts	6	3	5	5	2	3	4	1	0
Grass LAI-height relation	-	LAI-h relation	h=LAI/24	h=LAI/24	h=LAI/24	h=LAI/24	h=LAI/24	h=LAI/24	h=LAI/24	h=LAI/24	h=LAI/24
Decay constant on a 40°C basis, metabolic surface litter	day-1	k_met_sur	1/12,5	1/12,5	1/12,5	1/12,5	1/12,5	1/12,5	1/12,5	1/12,5	1/12,5
Decay constant on a 40°C basis, structural surface litter	day-1	k_str_sur	1/46	1/46	1/46	1/46	1/46	1/46	1/46	1/46	1/46
Decay constant on a 40°C basis, metabolic subsurface litter	day-1	k_met_ssr	1/10	1/10	1/10	1/10	1/10	1/10	1/10	1/10	1/10
Decay constant on a 40°C basis, structural subsurface litter	day-1	k_str_ss	1/37	1/37	1/37	1/37	1/37	1/37	1/37	1/37	1/37
Critical ratio C:N bacteria	-	R_CN_bac	5.2	5.2	5.2	5.2	5.2	5.2	5.2	5.2	5.2
Critical ratio C:N fungi	-	R_CN_fun	6.5	6.5	6.5	6.5	6.5	6.5	6.5	6.5	6.5
Critical ratio C:N mycorrhiza	-	R_CN_myc	18	18	18	18	18	18	18	18	18
Critical ratio C:N earthworms	-	R_CN_ew	10	10	10	10	10	10	10	10	10
Critical ratio C:P bacteria	-	R_CP_bac	16	16	16	16	16	16	16	16	16
Critical ratio C:P fungi	-	R_CP_fun	40	40	40	40	40	40	40	40	40
Critical ratio C:P mycorrhiza	-	R_CP_myc	120	120	120	120	120	120	120	120	120
Leaching coefficient C	mm yr-1	lambda_C	0.0015	0.0015	0.0015	0.0015	0.0015	0.0015	0.0015	0.0015	0.0015
Leaching coefficient N	mm yr-1	lambda_N	0.0015	0.0015	0.0015	0.0015	0.0015	0.0015	0.0015	0.0015	0.0015
Leaching coefficient P	mm yr-1	lambda_P	0.0001	0.0001	0.0001	0.0001	0.0001	0.0001	0.0001	0.0001	0.0001
Leaching coefficient K	mm yr-1	lambda_K	0.9	0.9	0.9	0.9	0.9	0.9	0.9	0.9	0.9
Fraction of organic leaching	[0-1]	f_org_lea	1	1	1	1	1	1	1	1	1
Solubility coefficienrs for leakage and passive uptake NH4	-	aNH4	0.05	0.05	0.05	0.05	0.05	0.05	0.05	0.05	0.05
Solubility coefficienrs for leakage and passive uptake NO3	-	aNO3	1	1	1	1	1	1	1	1	1
Solubility coefficienrs for leakage and passive uptake P	-	aP	0.005	0.005	0.005	0.005	0.005	0.005	0.005	0.005	0.005
Solubility coefficienrs for leakage and passive uptake K	-	aK	1	1	1	1	1	1	1	1	1
Solubility coefficienrs for leakage and passive uptake DOC	-	aDOC	0.04	0.04	0.04	0.04	0.04	0.04	0.04	0.04	0.04
Solubility coefficienrs for leakage and passive uptake DON	.	aDON	1	1	1	1	1	1	1	1	1
Solubility coefficienrs for leakage and passive uptake DOP	-	aDOP	1	1	1	1	1	1	1	1	1
