# Supplementary material for: Impacts of fertilization on grassland productivity and water quality across the European Alps under current and warming climate: insights from a mechanistic model
Source: Copernicus journal article supplement (doi:10.5194/bg-18-1917-2021), 2021-03-19
Supplement: Supplementary file 2 [file bg-18-1917-2021-supplement.zip]

**Impacts of fertilization on grassland productivity and water quality across the European Alps under current and warming climate: insights from a mechanistic model**

M. Botter<sup>1</sup>, M. Zeeman<sup>2</sup>, P. Burlando<sup>1</sup>, and S. Fatichi<sup>3</sup>

<sup>1</sup>Institute for Environmental Engineering, ETH Zurich, Switzerland

<sup>2</sup> Karlsruhe Institute of Technology, Institute of Meteorology and Climate Research, Atmospheric Environmental Research, Garmisch-Partenkirchen, Germany.

<sup>3</sup>Department of Civil and Environmental Engineering, National University of Singapore, Singapore.

**Contents of this file**

Figure S1  
Figure S2  
Figure S3  
Figure S4  
Figure S5  
Figure S6  
Figure S7  
Table S1  
Table S2  
Table S3

**Introduction**

The supporting information includes additional results supporting the analysis of the main manuscript (Figure S1- S7 and Table S2-S3) and the list of the model parameters for each study site (Table S1)

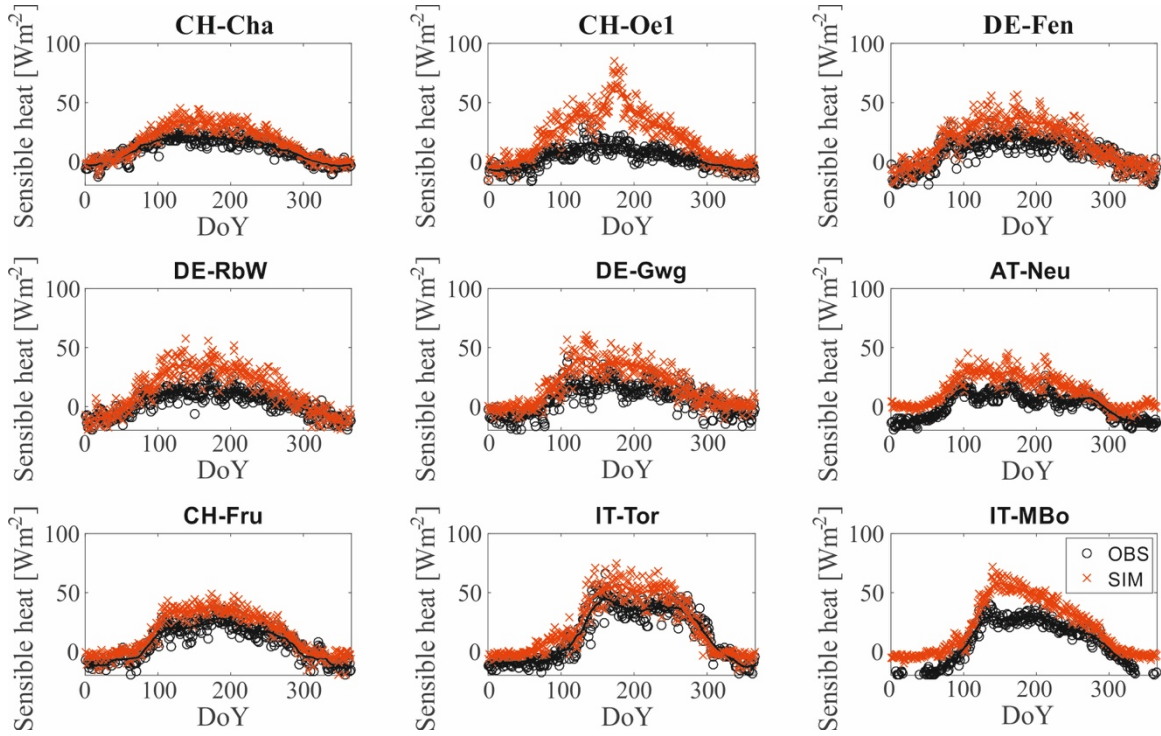

35 **Figure S1. Observed versus simulated seasonal sensible heat (H).** We compare the observed (black circles) and simulated (red crosses) seasonal pattern of H computing the average value for every day of the year (DoY) considering all the years for which observations are available. We also apply a moving average with a centered window of 30 days (continuous lines).

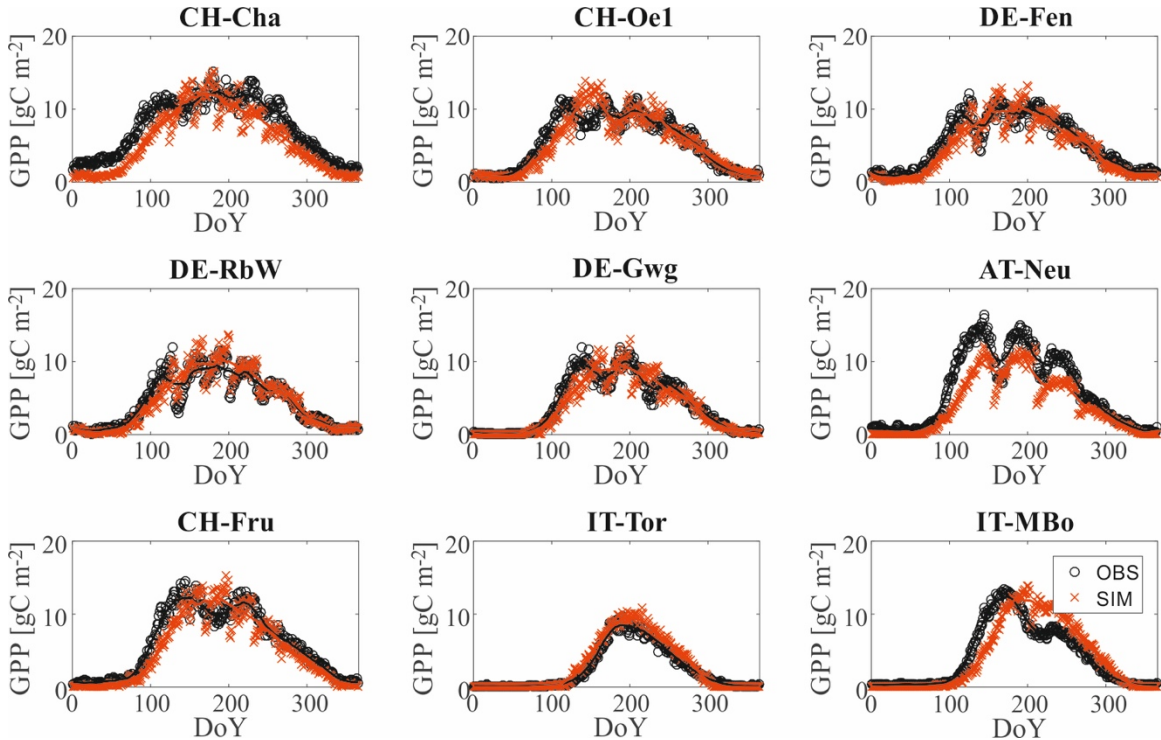

**Figure S2. Observed versus simulated seasonal Gross Primary Production (GPP).** We compare the observed (black circles) and simulated (red crosses) seasonal pattern of GPP computing the average value for every day of the year (DoY) considering all the years for which observations are available. We also apply a moving average with a centered window of 30 days (continuous lines).

45

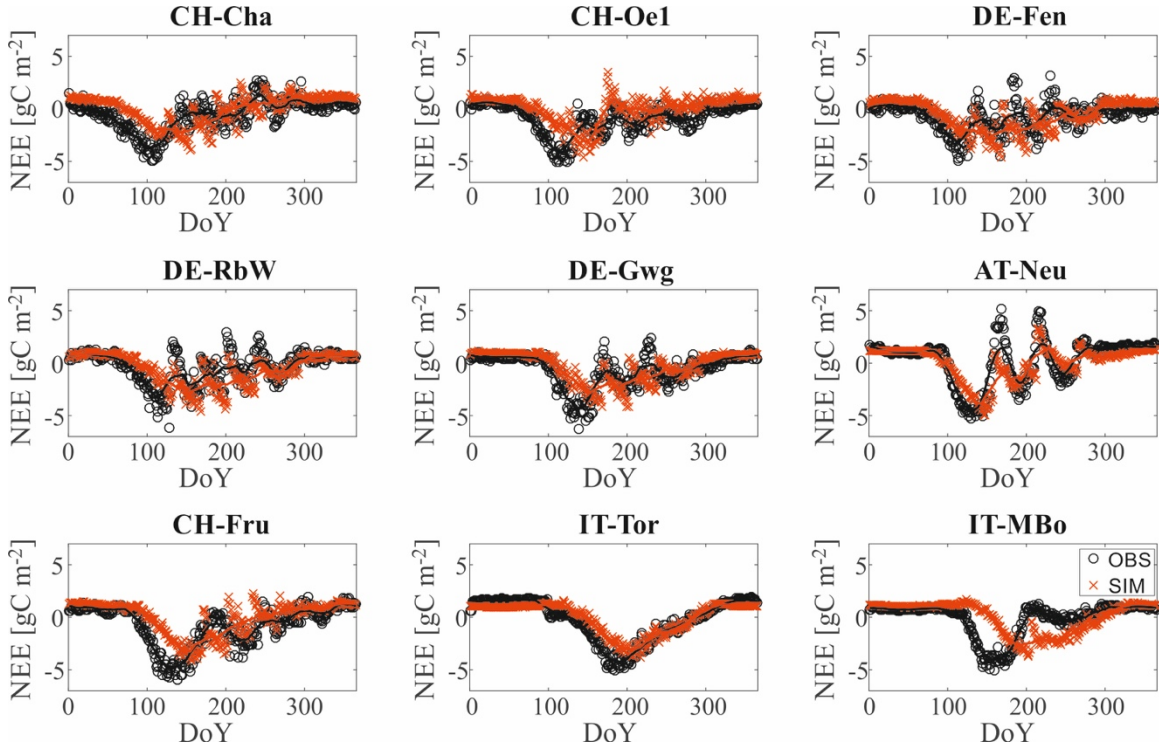

**Figure S3. Observed versus simulated seasonal Net Ecosystem Exchange (NEE).** We compare the observed (black circles) and simulated (red crosses) seasonal pattern of NEE computing the average value for every day of the year (DoY) considering all the years for which observations are available. We also apply a moving average with a centered window of 30 days (continuous lines).

50

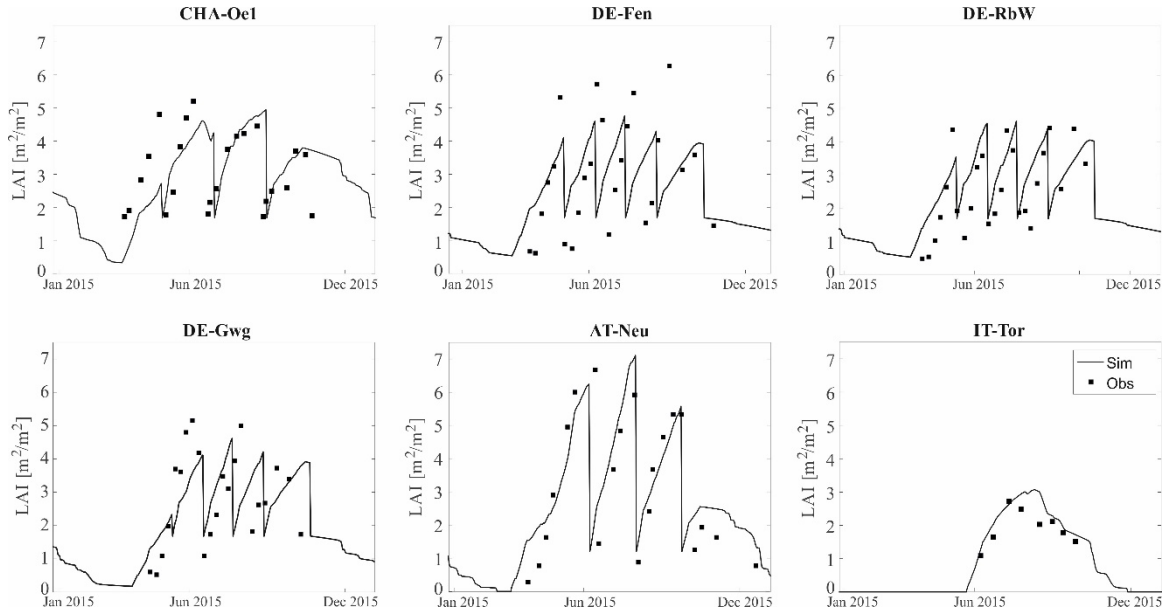

**Figure S4. Zoom on the yearly pattern of observed vs. simulated Leaf Area Index (LAI) in CH-Cha, DE-Fen, DE-RbW, DE-Gwg, AT-Neu, and IT-Tor.** Simulations (black line) are compared with observations (black dots). LAI data for CH-Cha are retrieved from Chang et al., 2013. Observations for DE-Fen, DE-RbW and DE-Gwg are retrieved from the ScaleX campaign 2015 (Wolf et al. 2017; Zeeman et al. 2019). LAI data for AT-Neu were digitalized from Wohlfahrt et al., 2008 and LAI data in IT-Tor were provided by the Environmental Protection Agency of Aosta Valley (Filippa et al., 2015).

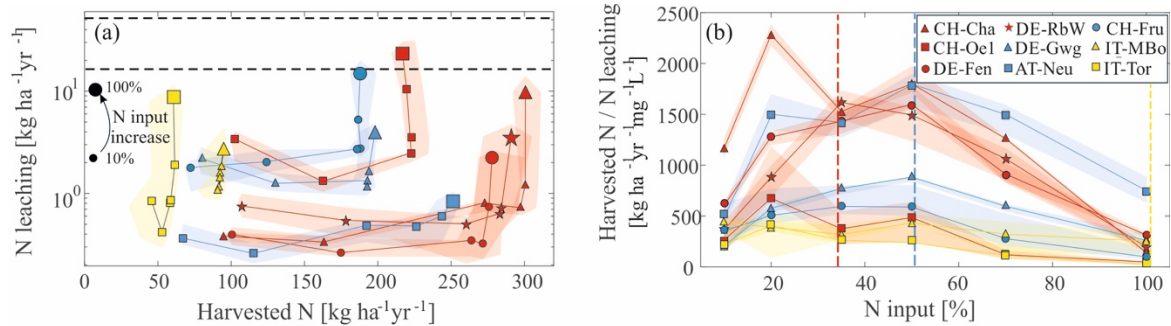

**Figure S5. Results of the modified climate experiments.** (a) Harvested N vs N leaching in each site. Moving counterclockwise follows the increase in N input. As a reference the biggest marker indicates N input of 100%. The dotted lines represent the estimate of maximum  $\text{NO}_3^-$  losses assumed by EU regulations or nearby countries. They correspond to the values 17 and 51  $\text{kgN ha}^{-1} \text{yr}^{-1}$ , i.e., 10% and 30% of the maximum allowed input 170  $\text{kgN ha}^{-1} \text{yr}^{-1}$ . (b) N fertilization efficiency index computed as the ratio between the harvested N and N concentration in groundwater recharge as a function of nitrogen input. In all the subplots the colors represent the elevation class, i.e., pre-Alpine (red), Alpine (blue) and high-Alpine (yellow) sites. The colored area around the markers and lines represent the 25<sup>th</sup> and 75<sup>th</sup> percentile of the interannual variability of the simulated variables, while the colored lines connecting data points represent the median values. The vertical dashed bars represent the limit of 170  $\text{kgN ha}^{-1} \text{yr}^{-1}$  imposed by the EU Nitrate Directive in each of the three classes.

75

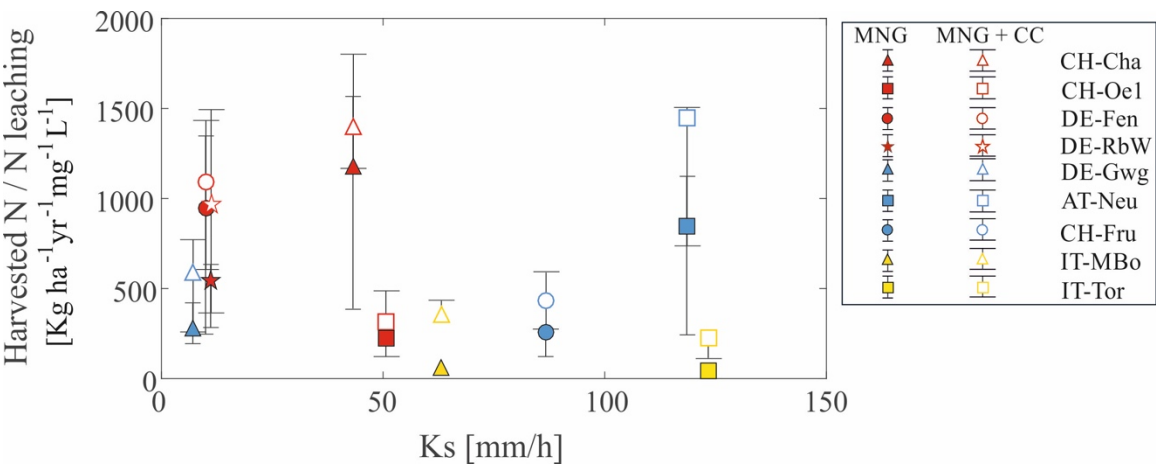

80

**Figure S6.** Ratio between harvested N and N leaching concentration as a function of soil saturated hydraulic conductivity (Ks). The whiskers span the 25th and 75th percentile of the interannual variability. Full markers refer to management scenarios (MNG), while empty markers refer to management + climate change (MNG + CC) scenarios.

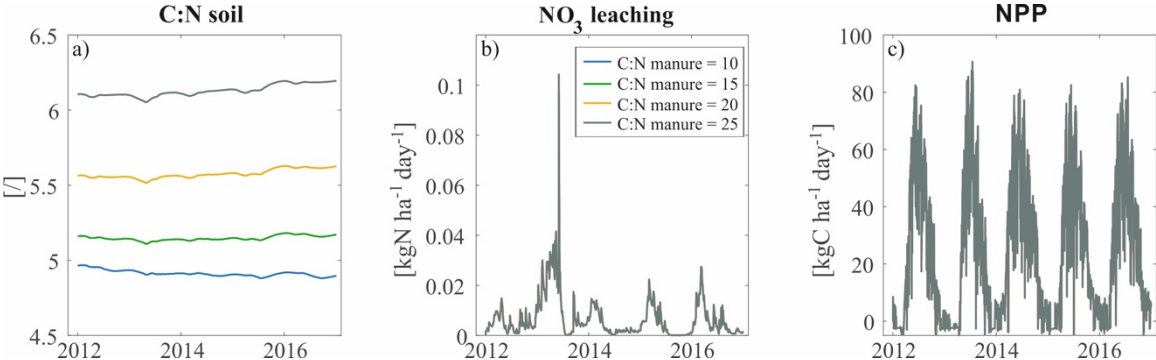

85

**Figure S7. Results of experiments performed in DE-RbW adding manure to the system with different C:N values.** (a) C:N of soil, (b) N leaching and (c) grass NPP patterns resulting from simulations characterized by addition of manure with increasing C:N values. Simulations are run with C:N=10 (blue), C:N=15 (green), C:N=20 (yellow) and C:N=25 (grey). All the lines almost perfectly overlaps in subplot (b) and (c)

90

**Table S1.** Model parametrization in each site.

**Table S2.** Mean bias error (MBR), Mean Absolute Error (MAE) and Root Mean Square Error (RMSE) of the simulated latent heat, sensible heat, net radiation, and GPP compared to observations from flux towers. The values of the goodness of fit indexes is reported for each station.

|        | Latent heat                |                            |                             | Sensible heat              |                            |                             | Net radiation              |                            |                             | GPP                                              |                                                  |                                                   |
|--------|----------------------------|----------------------------|-----------------------------|----------------------------|----------------------------|-----------------------------|----------------------------|----------------------------|-----------------------------|--------------------------------------------------|--------------------------------------------------|---------------------------------------------------|
|        | MBE<br>(Wm <sup>-2</sup> ) | MAE<br>(Wm <sup>-2</sup> ) | RMSE<br>(Wm <sup>-2</sup> ) | MBE<br>(Wm <sup>-2</sup> ) | MAE<br>(Wm <sup>-2</sup> ) | RMSE<br>(Wm <sup>-2</sup> ) | MBE<br>(Wm <sup>-2</sup> ) | MAE<br>(Wm <sup>-2</sup> ) | RMSE<br>(Wm <sup>-2</sup> ) | MBE<br>(gCm <sup>-2</sup><br>day <sup>-1</sup> ) | MAE<br>(gCm <sup>-2</sup><br>day <sup>-1</sup> ) | RMSE<br>(gCm <sup>-2</sup><br>day <sup>-1</sup> ) |
| CH-Cha | -8.53                      | 21.0                       | 35.2                        | 6.29                       | 14.90                      | 25                          | -0.08                      | 14.3                       | 26.27                       | -1.30                                            | 2.7                                              | 4.90                                              |

|        |       |      |      |       |       |    |        |       |       |       |      |      |
|--------|-------|------|------|-------|-------|----|--------|-------|-------|-------|------|------|
| CH-Oel | -2.54 | 19.7 | 34.0 | 18.25 | 24.22 | 43 | 11.52  | 16.34 | 28.09 | -0.21 | 2.28 | 4.73 |
| DE-Fen | 5.17  | 26.0 | 41.2 | 12.19 | 22.70 | 33 | 8.27   | 23.4  | 34.50 | -0.50 | 1.9  | 3.78 |
| DE-RbW | 22.53 | 27.6 | 45.9 | 11.80 | 21.77 | 34 | -18.75 | 53.61 | 88.19 | 0.01  | 1.69 | 3.49 |
| DE-Gwg | 1.90  | 25.8 | 49.0 | 16.04 | 25.36 | 41 | 11.66  | 24.56 | 38.58 | -0.29 | 1.52 | 3.28 |
| AT-Neu | 3.54  | 16.1 | 34.3 | 12.20 | 20.51 | 34 | 5.50   | 29.05 | 41.63 | -1.72 | 2.29 | 4.55 |
| CH-Fru | -7.94 | 19.5 | 32.8 | 7.49  | 17.77 | 28 | -0.63  | 15.41 | 31.69 | -0.49 | 1.75 | 3.51 |
| IT-MBo | -5.39 | 14.5 | 27.6 | 10.07 | 18.25 | 37 | 13.44  | 26.07 | 46.74 | -0.20 | 1.14 | 2.50 |
| IT-Tor | -1.99 | 15.2 | 26.3 | 15.95 | 24.55 | 35 | 8.04   | 24.07 | 43.58 | -0.03 | 1.87 | 3.88 |

95 **Table S3.** Soil C:N ratio resulting from the long-term spin-up process vs observed soil C:N across the different sites.

|        | SOIL C:N    |              |                     |
|--------|-------------|--------------|---------------------|
|        | Spin-up     | Observations | Reference           |
| CH-Cha | 8.46 ± 0.04 | 9.4 ± 0.1    | Roth, 2006          |
| CH-Oel | 5.85 ± 0.04 | 9.3          | Amman et al., 2009  |
| DE-Fen | 5.29 ± 0.04 | 8.8 ± 0.1    | Fu et al., 2017     |
| DE-RbW | 5.00 ± 0.03 | 8.9 ± 0.1    | Fu et al., 2017     |
| DE-Gwg | 6.19 ± 0.06 | 8.8 ± 0.1    | Fu et al., 2017     |
| AT-Neu | 7.07 ± 0.03 | 9.5          | Kitz et al., 2019   |
| CH-Fru | 8.86 ± 0.06 | 12.4         | Roth, 2006          |
| IT-MBo | 6.48 ± 0.04 | 11.45        | Peichl et al., 2013 |
| IT-Tor | 6.15 ± 0.06 | 12.73        | Peichl et al., 2013 |

100

## References

- 105 Ammann, Christof, Spirig, C., Leifeld, J., and Neftel, A.: Assessment of the nitrogen and carbon budget of two managed temperate grassland fields. *Agriculture, Ecosystems and Environment*, 133(3–4), 150–162, <https://doi.org/10.1016/j.agee.2009.05.006>, 2009
- Chang, J. F., Viovy, N., Vuichard, N., Ciais, P., Wang, T., Cozic, A., Lardy, R., Graux, A. I., Klumpp, K., Martin, R., and Soussana, J. F.: Incorporating grassland management in ORCHIDEE: model description and evaluation at 11 eddy-covariance sites in Europe. *Geoscientific Model Development*, 2013.
- 110 Filippa, G., Cremonese, E., Galvagno, M., Migliavacca, M., Morra di Cella, U., Petey, M., and Siniscalco, C.: Five years of phenological monitoring in a mountain grassland: inter-annual patterns and evaluation of the sampling protocol, *International Journal of Biometeorology*, 59(12), 1927–1937, <https://doi.org/10.1007/s00484-015-0999-5>, 2015.
- 115 Fu, J., Gasche, R., Wang, N., Lu, H., Butterbach-Bahl, K., and Kiese, R.: Impacts of climate and management on water balance and nitrogen leaching from montane grassland soils of S-Germany, *Environmental Pollution*, 229, 119–131. <https://doi.org/10.1016/J.ENVPOL.2017.05.071>, 2017.
- Kitz, F., Gómez-Brandón, M., Eder, B., Etemadi, M., Spielmann, F.M., Hammerle, A., Insam, H., and

- Wohlfahrt, G.: Soil carbonyl sulfide exchange in relation to microbial community composition: Insights from a managed grassland soil amendment experiment, *Soil Biology and Biochemistry*, 135, 28-37. <https://doi.org/10.1016/j.soilbio.2019.04.005>. 2019.
- 120 Peichl, M., Sonnentag, O., Wohlfahrt, G., Flanagan, L. B., Baldocchi, D. D., Kiely, G., Galvagno, M., Gianelle D., Marcolla, B., Pio, C., Migliavacca, M., Jones, M. B., and Saunders, M.: Convergence of potential net ecosystem production among contrasting C3 grasslands, *Ecology Letters*, 16:502-512. <https://doi.org/10.1111/ele.12075>. 2013.
- 125 Roth, K.: Bodenkartierung und GIS-basierte Kohlenstoffinventur von Graslandböden: Untersuchungen an den ETH-Forschungsstationen Chamau und Frübüel (ZG, Schweiz). Master's thesis. Institute of Geography, University of Zurich. 2006
- Wolf, B., C. Chwala, B. Fersch, J. Garvelmann, W. Junkermann, M. J. Zeeman, A. Angerer, et al.: The Scalex Campaign: Scale-Crossing Land Surface and Boundary Layer Processes in the TERENO-Prealpine Observatory, *Bulletin of the American Meteorological Society*, 98 (6): 1217–34. <https://doi.org/10.1175/BAMS-D-15-00277.1>, 2017.
- 130 Wohlfahrt, G., Hammerle, A., Haslwanter, A., Bahn, M., Tappeiner, U., and Cernusca, A.: Seasonal and inter-annual variability of the net ecosystem CO<sub>2</sub> exchange of a temperate mountain grassland: Effects of weather and management, *Journal of Geophysical Research*, 113(D8), <https://doi.org/10.1029/2007JD009286>, 2008.
- 135 Zeeman, M. J., Shupe, H., Baessler, C., and Ruehr N. K.: Productivity and Vegetation Structure of Three Differently Managed Temperate Grasslands, *Agriculture, Ecosystems and Environment*, 270–271, <https://doi.org/10.1016/j.agee.2018.10.003>, 2019.
