# Supplementary material for: Impacts of fertilization on grassland productivity and water quality across the European Alps under current and warming climate: insights from a mechanistic model
Source: Copernicus journal article supplement (doi:10.5194/bg-18-1917-2021), 2021-03-19
Supplement: Supplementary file 3 [file bg-18-1917-2021-supplement.zip]

Archive with 4 entries (3 files):
- bg-18-1917-2021-supplement-title-page.pdf
- Supplementary/
- Supplementary/Table S1.xlsx
- Supplementary/Botter_et_al_SI.pdf
